# Supplementary material for: Optical and Electrochemical Properties of a Nanostructured ZnO Thin Layer Deposited on a Nanoporous Alumina Structure via Atomic Layer Deposition
Source: MDPI journal article supplement (doi:10.3390/ma17061412), 2024-03-20
Supplement: s1 [file s1]

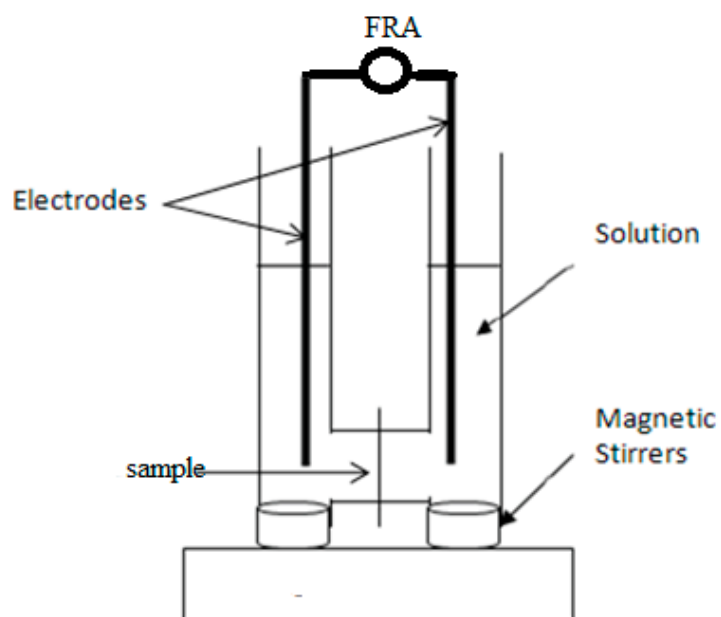

**Figure S1.** Scheme of dead-end electrochemical cell [44].

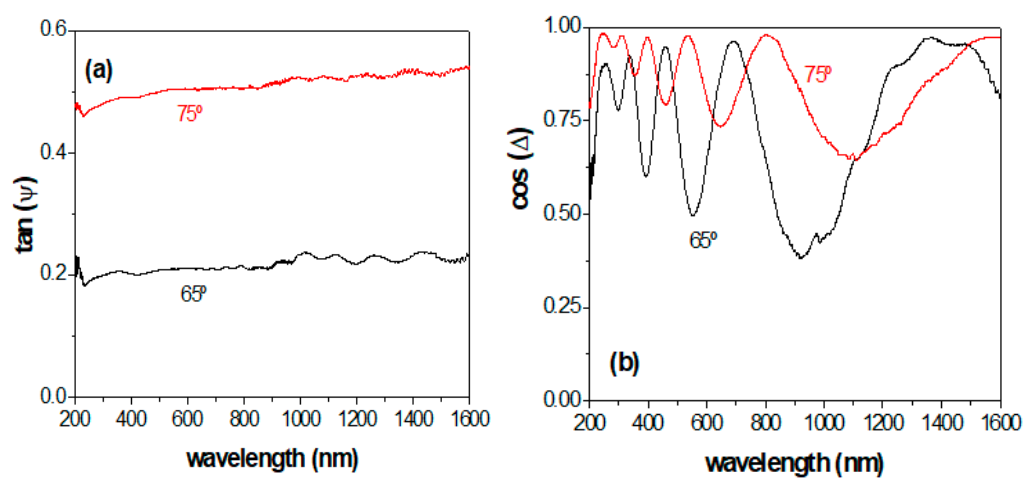

**Figure S2.** Wavelength dependence of spectroscopy ellipsometry experimental angles: (a)  $\tan(\Psi)$ ; (b)  $\cos(\Delta)$ , for the two measured angles ( $65^\circ$  and  $75^\circ$ ).

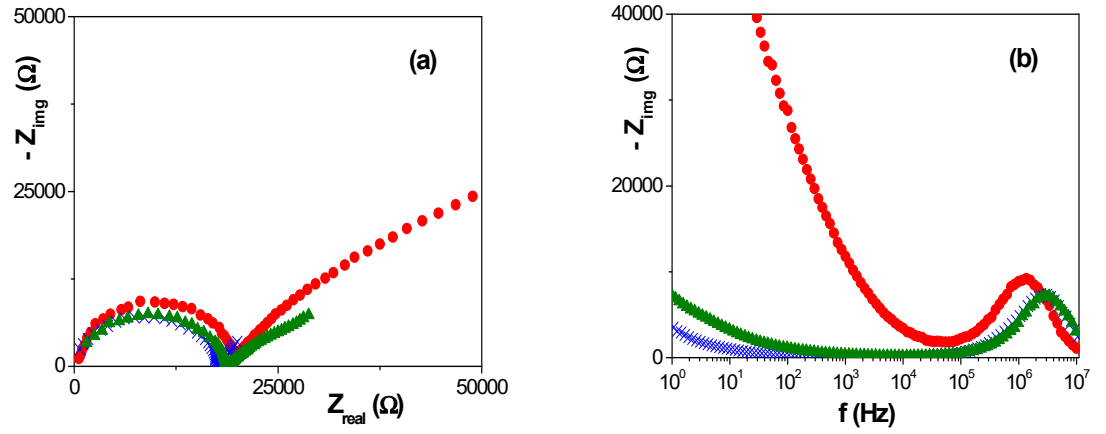

**Figure S3.** Comparison of impedance plots for Al-ZnO (●) and Al-SiO<sub>2</sub> (▲) samples in contact with 2x10<sup>-3</sup> M NaCl solution, and the 2x10<sup>-3</sup> M NaCl solution (x). (a) Nyquist plots; (b) Bode plots. Data values for Al-ZnO sample starts at 30 Hz for scaling reason.

**Table S1:** Atomic concentration percentages of the elements found on the surface of the Al/ZnO thin nanofilm\*.

| Sample   | C (%) | Al (%) | O (%) | Zn (%) |
|----------|-------|--------|-------|--------|
| NPAS+ZnO | 43.3  | 8.7    | 37.6  | 10.2   |

\* elements with A.C. %  $\leq 0.5$  are not indicated.
